# Supplementary material for: Cloning of an Albino Mutation of Arabidopsis thaliana Using Mapping-by-Sequencing
Source: MDPI journal article supplement (doi:10.3390/ijms24044196), 2023-02-20
Supplement: s1 [file s1]

**Table S1.** Oligonucleotides used in this work.

| Primer           | Nucleotide sequence (5'→3')                        |
|------------------|----------------------------------------------------|
| At2g04030-F      | CGTCGTGGAACACAAATCAC                               |
| At2g04030-R      | AGGCTTACCCATAGCGGTTT                               |
| At2g04030-cds-F  | ggggacaagttgtacaaaaagcaggctTAATGGCTCCTGCTTTGAGTA   |
| At2g04030-cds-R  | ggggaccactttgtacaagaaagctgggtCAATCTTGCCAAGGATCACTC |
| At5g17710-cds-F  | ggggacaagttgtacaaaaagcaggctCCATGGCCGGTCTACTCAAAA   |
| At5g17710-cds R1 | ggggaccactttgtacaagaaagctgggtCAAGATGAAGATGATTCTTC  |
| At1g36390-cds-F  | ggggacaagttgtacaaaaagcaggctCAATGGCGATTTCTTTTCGCAA  |
| At1g36390-cds R1 | ggggaccactttgtacaagaaagctgggtCAAGCAGAAGGTGTTATTTC  |
| SP6              | ATTTAGGTGACACTATAG                                 |
| T7 Fwd pGEM      | GTAATACGACTCACTATAGGGC                             |
| M13-F            | CGCCAGGGTTTTCCCAGTCACGAC                           |
| M13-R            | TCACACAGGAAACAGCTATGAC                             |
| NOS-R            | AGTAACATAGATGACACCGCGC                             |
| CS16104-F        | TCTCAGTTCGTTGGGTTTCC                               |
| CS16104-R        | CACGCTTCACGTAGAGACGA                               |
| Salk_012235 RP   | ATTGGGATTGGGAAGTAGCC                               |
| Salk_012235 LP   | TCATCCAAGCTTGTCAATTC                               |
| Salk_120525 RP   | TCATCAGAGTCCACAACCTCCC                             |
| Salk_120525 LP   | GGTTGTTGTGTCCACCAAAAG                              |
| SALK_LBb1.3      | ATTTTGCCGATTTTCGGAAC                               |
| SAIL_LB3         | TAGCATCTGAATTTTCATAACCAATCTCGATACAC                |
| Oligo (dT)18     | TTTTTTTTTTTTTTTTTTT                                |
| T7 universal     | TAATACGACTCACTATAGGG                               |
| 3AD primer       | AGATGGTGCACGATGCACAG                               |

\* The sequences of the attB1 and attB2 sites, used by the Gateway cloning technology, are indicated using lowercase characters.

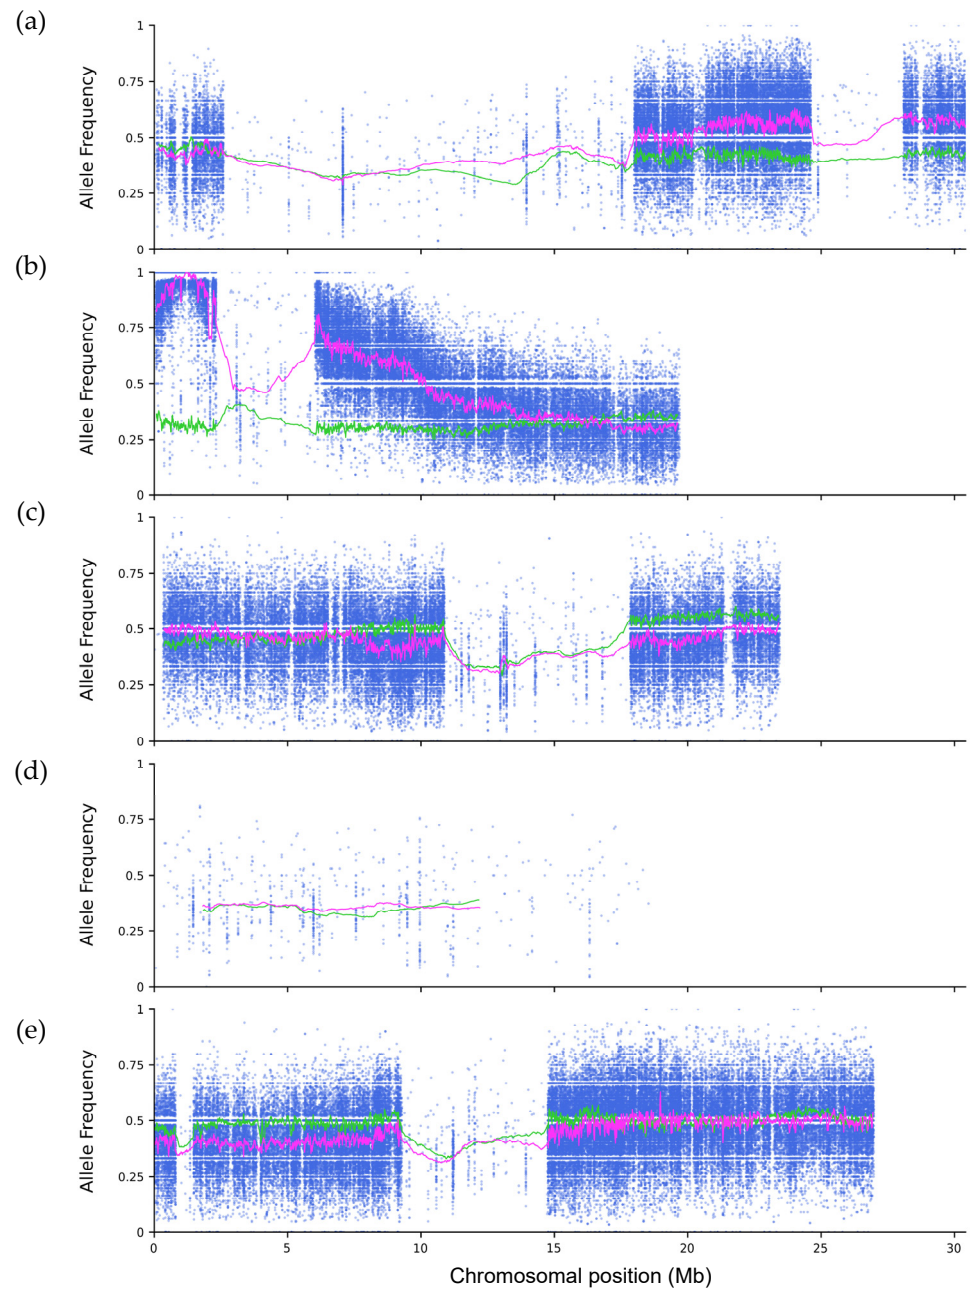

**Figure S1.** Frequency of alleles inherited from the mutant parent in a pool of F<sub>2</sub> seedlings exhibiting the mutant (albino) phenotype. (a) Chromosome 1. (b) Chromosome 2. (c) Chromosome 3. (d) Chromosome 4. (e) Chromosome 5. Each blue dot indicates the allele frequency of a biallelic SNP segregating in the population, as determined for the pool of mutants. The pink line indicates the moving average of the allele frequencies of 200 adjacent SNPs. The green line corresponds to the moving average of the allele frequencies in a pool of F<sub>2</sub> plants displaying the wild-type phenotype and is shown for comparison.

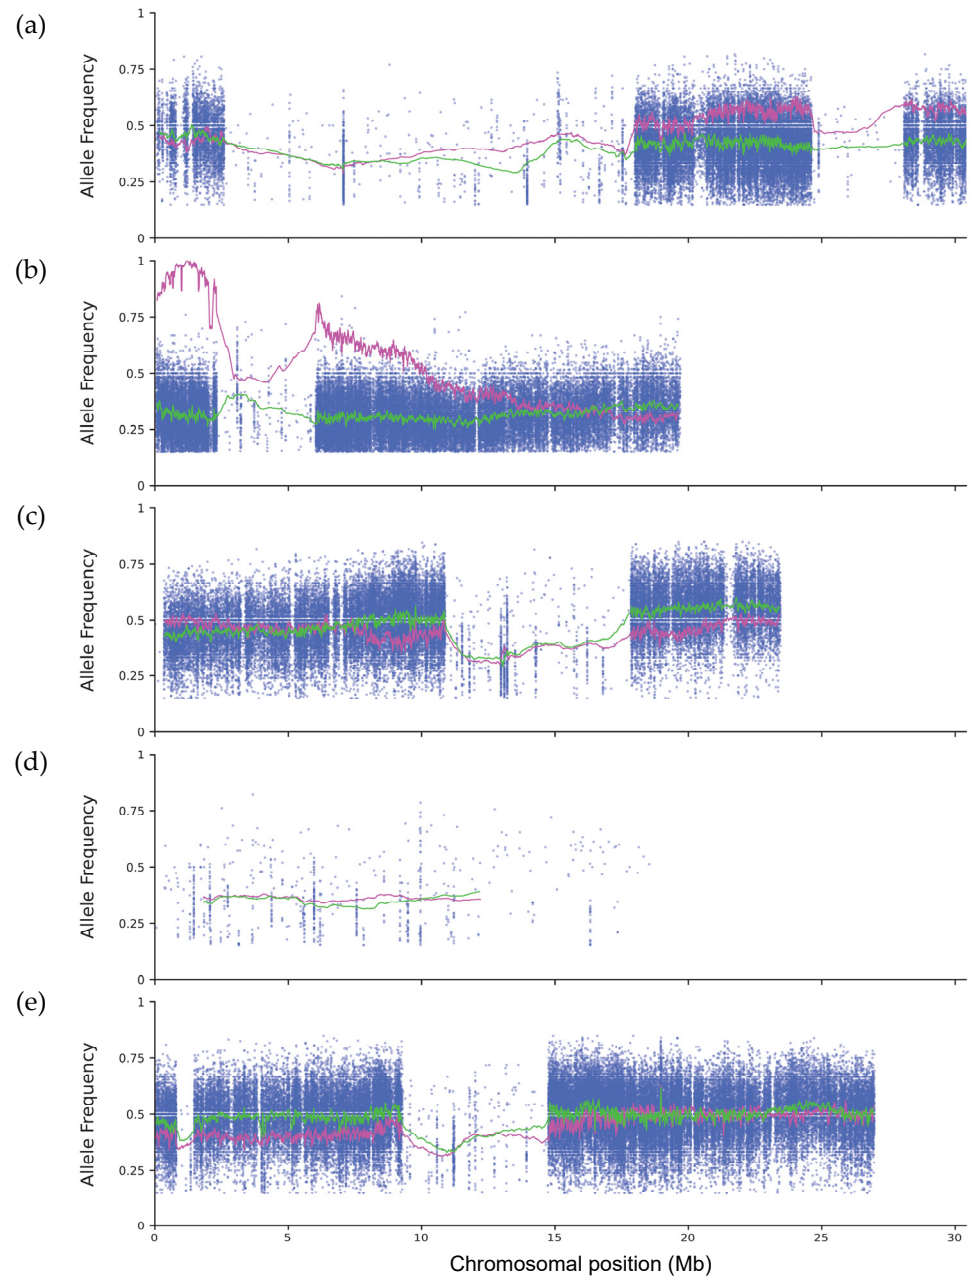

**Figure S2.** Frequency of alleles inherited from the mutant parent in a pool of F<sub>2</sub> seedlings exhibiting the wild-type (photosynthetic) phenotype. (a) Chromosome 1. (b) Chromosome 2. (c) Chromosome 3. (d) Chromosome 4. (e) Chromosome 5. Each blue dot indicates the allele frequency of a biallelic SNP segregating in the population, as determined for the pool of wild-type siblings. The green line indicates the moving average of the allele frequencies at 200 adjacent SNPs. The pink line corresponds to the moving average of the allele frequencies in a pool of F<sub>2</sub> plants displaying the mutant phenotype and is shown for comparison.

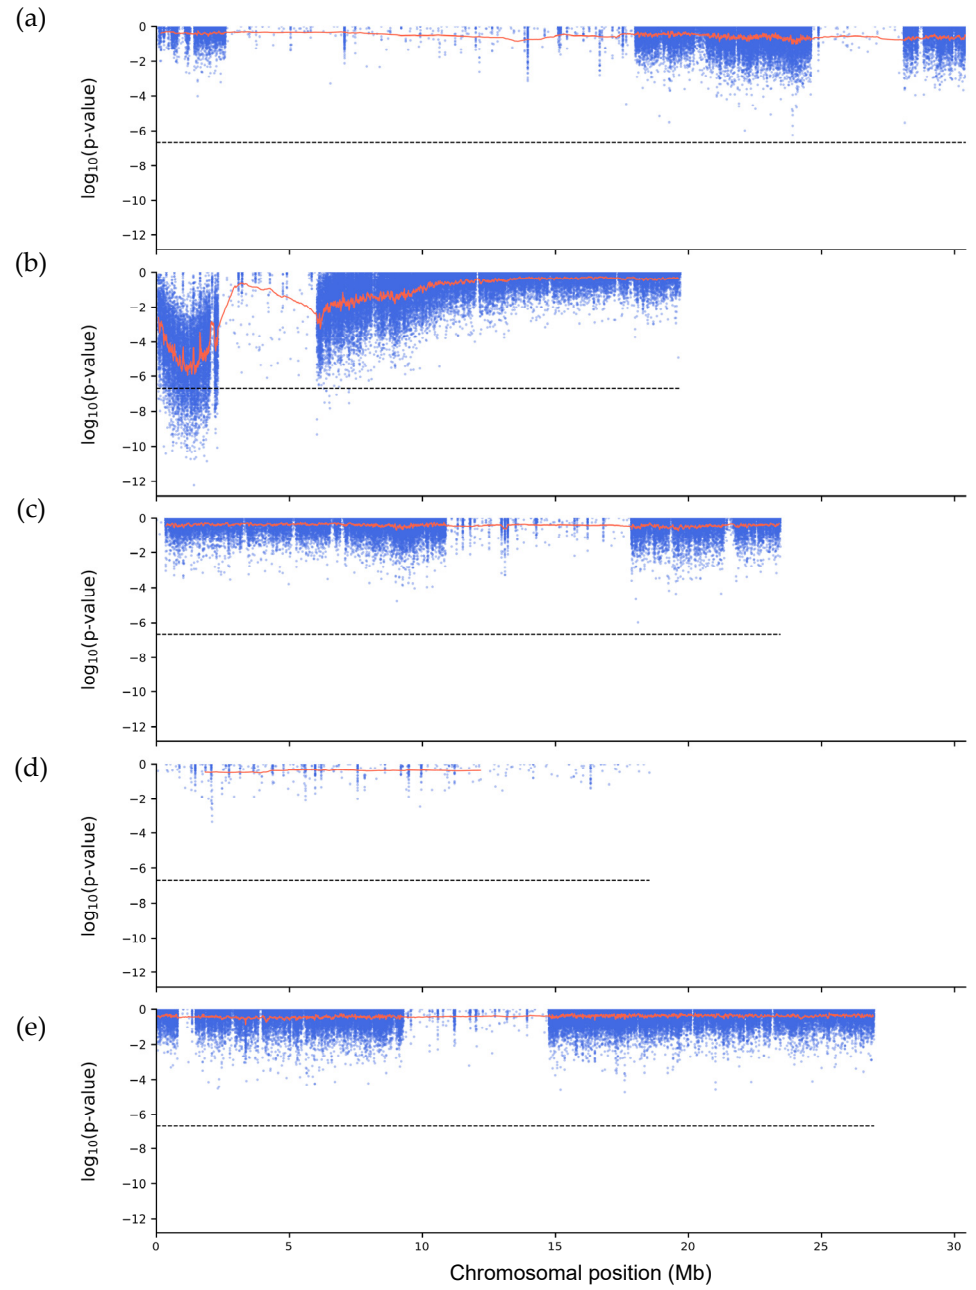

**Figure S3.**  $p$ -values of two-tailed Fisher's exact tests performed on the same dataset. (a) Chromosome 1. (b) Chromosome 2. (c) Chromosome 3. (d) Chromosome 4. (e) Chromosome 5. Each blue dot indicates the  $p$ -value of a biallelic SNP segregating in the population, as determined using the data from both pools. The red line indicates the weighted moving average of the  $p$ -values of 200 adjacent SNPs.

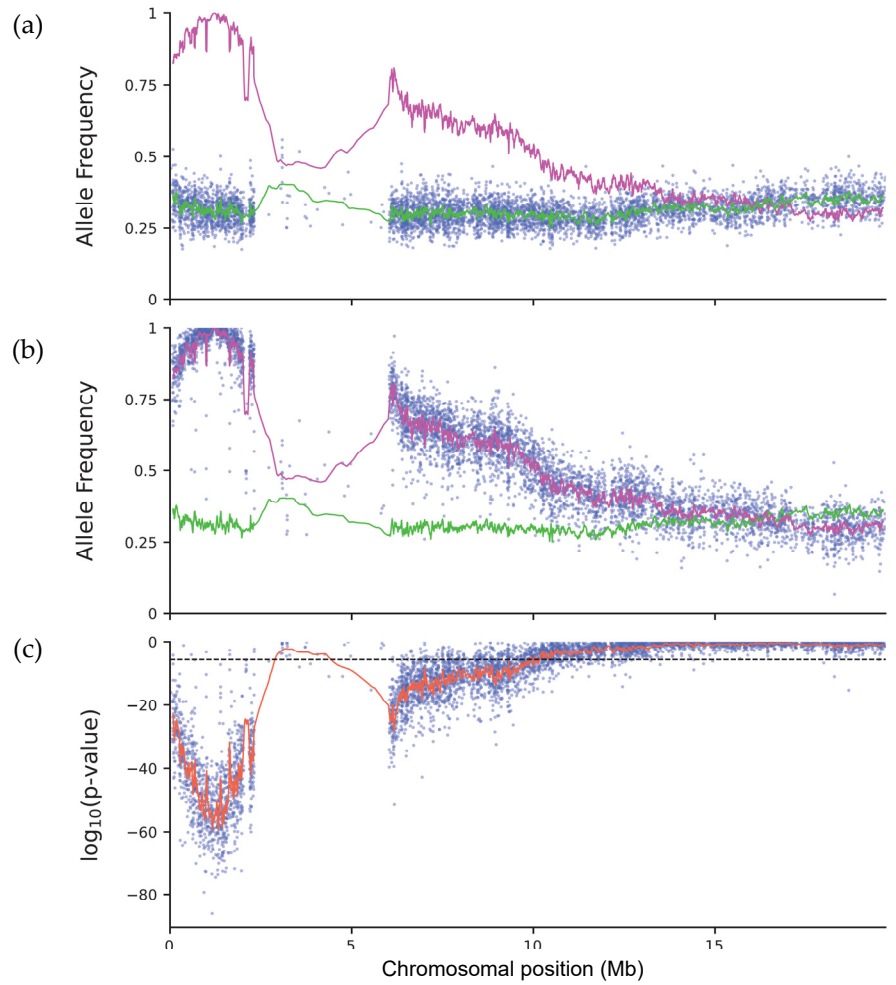

**Figure S4.** Mapping-by-sequencing of the recessive allele causing the albino seedling phenotype using bins of ten consecutive markers. The plots correspond to genomic regions defined by non-overlapping bins of ten consecutive markers located on chromosome 2. (a) Frequency of haplotypes inherited from the mutant parent in a pool of F<sub>2</sub> seedlings exhibiting the wild-type (photosynthetic) phenotype. (b) Frequency of haplotypes inherited from the mutant parent in a pool of F<sub>2</sub> seedlings exhibiting the mutant (albino) phenotype. (c)  $p$ -values of two-tailed Fisher's exact tests performed on the same dataset. Each blue dot indicates the allele frequency (a,b) or the  $p$ -value (c) of a biallelic SNP segregating in the population. The green and pink lines correspond to the moving averages of the values of 20 adjacent bins (i.e., 200 individual markers), determined in the pools of wild-type and mutant individuals. The red line corresponds to the weighted moving average of the  $p$ -values. The dashed line marks the significance threshold calculated using the Bonferroni correction, considering that  $n = 23,781$  genomic intervals (bins of up to 10 consecutive SNPs) have been tested.

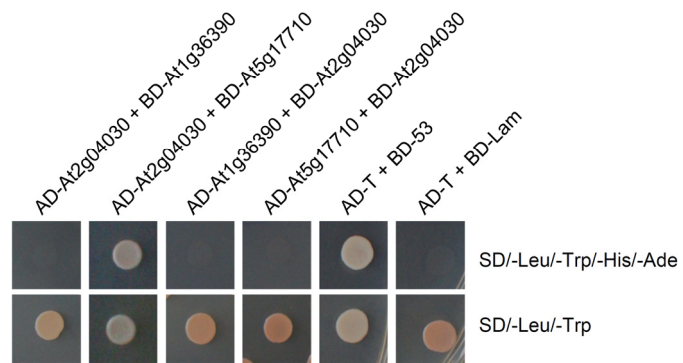

**Figure S5.** Pairwise yeast two-hybrid assays involving At2g04030 and two GrpE homologs, At5g17710 and At1g36390. AD: constructs containing the activation domain of Gal4; BD: constructs containing the DNA binding domain of Gal4. The interaction between pGBKT7-53 (Gal4 DNA-BD fused with murine p53, indicated as BD-53) and pGADT7-T (Gal4 AD fused with the SV40 large T-antigen, indicated as AD-T) was included as a positive control. The interaction pGADT7-T and pGBKT7-Lam (Gal4 BD fused with Lamin) was included as a negative control.
